1       **Title: Coping with multiple enemies: pairwise interactions do not predict**  
2                   **evolutionary change in complex multitrophic communities**

3       **Abstract**

4       Predicting the ecological and evolutionary trajectories of populations in multispecies  
5       communities is one of the fundamental challenges in ecology. Many of these  
6       predictions are made by scaling patterns observed from pairwise interactions. Here,  
7       we show that the coupling of ecological and evolutionary outcomes is likely to be  
8       weaker in increasingly complex communities due to greater chance of life-history  
9       trait correlations. Using model microbial communities comprising a focal bacterial  
10      species (*Bacillus subtilis*), a bacterial competitor, protist predator and phage  
11      parasite, we found that increasing the number of enemies in a community had an  
12      overall negative effect on *B. subtilis* population growth. However, only the competitor  
13      imposed direct selection for *B. subtilis* trait evolution in pairwise cultures and this  
14      effect was weakened in the presence of other antagonists that had a negative effect  
15      on the competitor. In contrast, adaptation to parasites was driven indirectly by  
16      correlated selection where competitors had a positive and predators a negative  
17      effect. For all measured traits, selection in pairwise communities was a poor  
18      predictor of *B. subtilis* evolution in more complex communities. Together, our results  
19      suggest that coupling of ecological and evolutionary outcomes is interaction-specific  
20      and generally less evident in more complex communities where the increasing  
21      number of trait correlations could mask weak ecological signals.

22      **Keywords:** *Community ecology, microcosms, eco-evolutionary processes, evolution,*  
23      *community interactions, competition, predation, parasitism, bacteria*

## 25 **Introduction**

26 Species do not exist in isolation, but rather are embedded in a complex network,  
27 linked to other species through a diverse set of trophic and non-trophic interactions  
28 [Thompson 2005]. The ecological and evolutionary dynamics of many focal species  
29 have been detailed using both theory and empirical approaches, yet we have  
30 remarkably little insight into the effects of community complexity on shaping these  
31 dynamics [Lytle 2001; Koskella 2014; Barraclough 2015]. Predicting the outcome of  
32 these interactions on the density and traits of a given species within a multi-species  
33 community is vital for understanding the long-term effects of environmental and biotic  
34 change on the biodiversity and stability of communities [e.g. Yoshida 2003; Johnson  
35 2007; Post 2009; Lawrence 2012; Loreau 2013; Donohue 2016; Mrowicki 2016].  
36 Strong, consistent interspecific interactions also have the potential to impose heavy  
37 selection pressures on species [Koskella 2011; Lawrence 2012; Friman 2013], with  
38 significant implications for evolutionary trajectories [Yoshida 2003]. This predicts that  
39 the selection pressures facing an organism in a complex multi-species system are  
40 likely to be contingent upon the composition of that community and, moreover, that  
41 the addition of species may dampen or promote evolutionary responses to individual  
42 selection pressures [e.g. De Mazancourt 2008; Collins 2014; Betts 2015].

43 Predation [Sherr 2002; Friman 2013; McClean 2015], parasitism [Vos 2009;  
44 Penczykowski 2016] and competition [Gause 1934; Hardin 1960; Foster 2012;  
45 Friman 2014] are three major sources of antagonistic interactions for organisms.  
46 These interactions act to reduce population densities both directly, by increasing  
47 mortality and reducing recruitment, and indirectly, through competition for space and  
48 resources. How these different types of interactions separately and importantly

49 collectively affect the population densities of focal species and trait evolution is still  
50 relatively unexplored. First, it is possible that increasing the number of antagonistic  
51 interactions in the community will have additively negative effects on the population  
52 density of the focal species. Alternatively, increasing the number of antagonists  
53 could weaken effects on focal species if they show negative effects on each other  
54 via, for example, intraguild predation [Friman 2016]. Further, the number and type of  
55 interactions could also affect the rate and trajectory of focal species evolution.  
56 Selection pressures exerted by multiple antagonistic interactions may, for example,  
57 result in trade-offs in terms of evolutionary outcomes [Stearns 1989; Friman 2013,  
58 2016]. Adaptations that may be beneficial in one context may be harmful in another,  
59 reducing the fitness benefit and, by extension, the rate of evolutionary change  
60 [Stearns 1989; Thompson 1994; Friman 2013; Garland 2014 ]. For example,  
61 predation tends to slow down the rate of host-parasite interactions [Friman 2013]  
62 and selection by multiple predator species can change the evolutionary trajectory of  
63 prey via trade-offs and correlated selection [Friman 2016]. This is because, even  
64 though predators [Pernlather 2005; Estes 2011; O'Connor 2015] and parasites [Kutz  
65 2005; Hudon 2006] exert strong selection for prey survival, the targets and  
66 mechanisms under predator and parasite selection are likely to differ. Similarly,  
67 evolution of defense against one antagonist might lead to increased susceptibility to  
68 another [Friman 2009].

69 In addition to predatory and parasitic enemies, competitive interactions are a  
70 pervasive force of selection and can be indirect or direct, mediated by shared  
71 resources or, in the case of bacteria, through antimicrobials [Wang 2017] or  
72 bacteriocins [Ghoul 2015]. Recent evidence from bacterial communities suggests  
73 that interference competition and parasitism can act synergistically to suppress

74 bacterial growth due to evolutionary trade-offs, where one selection pressure makes  
75 focal species more susceptible to the other [Wang 2017]. Furthermore, evolving  
76 resistance to strong antagonistic interactions has often been shown to come at a  
77 fitness cost [Tollrian 1995; Sheldon 1996; Van Buskirk 2000; Maclean 2004 ] that  
78 might limit the level of resistance or adaptation to the abiotic environment [Scanlan  
79 2015]. While most of the evidence to date suggests that parasites, predators and  
80 competitors impose strong selection that often leads to clear fitness trade-offs, trait  
81 correlations may also be positive or neutral [e.g. Wright 1999; Ackerly 2007;  
82 Chamberlain 2014]. Adaptations selected in one ecological context might therefore  
83 have unexpected consequences in other ecological contexts.

84 Pairwise interactions such as those among competing species have been shown to  
85 predict those in more complex communities within single trophic levels [Foster 2012;  
86 Rivett 2016]. However, relatively little is known about how different interactions  
87 across trophic levels within a community alter evolutionary trajectories. A recent  
88 study conducted with multiple predatory protists and a focal bacterial prey suggest  
89 that increasing the number of antagonists in the community can weaken pairwise  
90 evolutionary dynamics by increasing antagonism between different predator species  
91 [Friman 2016]. Similarly, the presence of both specialist and generalist consumers  
92 has been shown to change both coexistence and defence evolution in two competing  
93 prey species [Hiltunen 2017]. Here, we explore whether predictions from different  
94 types of antagonist pairwise interactions scale in communities with increasing  
95 complexity. To this end, we manipulated the composition of multitrophic microbial  
96 microcosm communities and examined how community complexity moderates the  
97 dynamics of a focal bacterium species – *Bacillus subtilis* – and, critically, its ability to  
98 evolve resistance to parasites (bacteriophage SPP1) and predators (*Paramecium*

99 *caudatum*) and to compete for resources with another bacterium (*Serratia*  
100 *marcescens*). We also examined whether exposure to multiple enemies modified *B.*  
101 *subtilis* growth adaptation in abiotic environments in the absence of other species.  
102 We found that increasing the number of enemies in a community had an overall  
103 negative effect on *B. subtilis*. However, only competitors imposed direct selection in  
104 antagonist monocultures, while both parasites and predators imposed only indirect  
105 correlated selection for resistance evolution in antagonist co-cultures. Crucially,  
106 ecological and evolutionary outcomes were coupled only under direct selection by  
107 competition, whereas no direct ecological or evolutionary signal was observed  
108 regarding *B. subtilis* resistance trait evolution. Together, our results suggest that eco-  
109 evolutionary outcomes might be interaction-specific and weakly coupled in more  
110 complex communities due to increased chance of coincidental life-history trait  
111 correlations.

## 112 **Methods**

113

### 114 ***Experimental design***

115 Our experiment consisted of seven sets of species combinations of *Bacillus subtilis*  
116 (NCIB3610) with (1) *SPP1* phage parasite in isolation; (2) *Paramecium caudatum*, a  
117 generalist [Johnson 1936; Thurman 2010; Banerjii 2015] bacterial predator in  
118 isolation; (3) *Serratia marcescens* (ATCC 29632), a competitor of *B. subtilis*, in  
119 isolation; (4) *P. caudatum* and *SPP1* phage; (5) *S. marcescens* and *SPP1* phage;  
120 (6) *S. marcescens* and *P. caudatum*; and (7) *S. marcescens*, *P. caudatum* and  
121 *SPP1* phage, resulting in a total of 7 experimental treatments, each replicated seven  
122 times.

123

124 **Community assembly**

125 Culture methods followed closely those outlined in McClean *et al.*, Lawler and Morin,  
126 and Leary *et al.* . Microcosms consisted of loosely capped 200 ml glass bottles with  
127 15 g glass microbeads providing spatial habitat structure. The addition of the glass  
128 beads allows for species to interact and behave in a more naturally complex  
129 environment. Each microcosm received 100 ml medium consisting of one protist  
130 pellet (Carolina Biological Supply, Burlington, NC, USA) per 1 litre spring water and  
131 two wheat seeds to provide a slow release nutrient source. All media were sterilised  
132 before use. Microcosms were maintained at 22 °C and under a 12:12 h light: dark  
133 cycle. Nutrients in the microcosms were replenished on day 7 with a replacement of  
134 7 ml of the microcosm volume with sterile medium and one additional sterile wheat  
135 seed. *Paramecium caudatum* were obtained from Blades Biological UK. Bacterial  
136 strains and SPP1 phage were taken from frozen laboratory stock cultures.

137

138 *P. caudatum* washing protocol

139 The *P. caudatum* protist cultures used for this experiment were laboratory cultures  
140 and therefore, while not inoculated with any bacterial populations, were not entirely  
141 sterile. To account for this, *P. caudatum* cultures were washed with sterile media  
142 before addition to the microcosms to minimise contamination. In addition, the  
143 remaining media from the washing process (minus *P. caudatum*) was combined,  
144 mixed thoroughly and a similar volume to the protist treatments was added to all  
145 microcosms to ensure that any bacteria present in the medium had an equal chance  
146 of colonising each microcosm in every treatment. We identified a single bacterial  
147 contaminant from this protist media, *Klebsiella sp.*, which colonised all microcosm

148 units in this manner in low frequencies and was treated as a standard ‘background’  
149 member of the community [McClellan 2015]. At the end of the experiment, the  
150 density of the *Klebsiella sp.* did not vary with experimental treatment over the course  
151 of the experiment (repeated measures ANOVA;  $F_{2,46} = 1.23$ ,  $P = 0.3$ ).

152

### 153 *Bacterial cultures*

154 Overnight cultures of strains *B. subtilis* (NCIB3610) and *S. marcescens* (ATCC  
155 29632), grown in a tryptone yeast (TY) medium (Luria-Bertani broth supplemented  
156 with 10 mM MgSO<sub>4</sub> and 100 M MnSO<sub>4</sub> after autoclaving [Wach 1996]), were diluted  
157 into fresh TY medium at an optical density at 600 nm (OD<sub>600</sub>) ~ 0.03 and grown at 37  
158 °C until late exponential phase (OD<sub>600</sub> ~ 1.0), at which time 1 ml of each bacterial  
159 culture was inoculated into 100 ml microcosm medium, as required for experimental  
160 treatments. A sample of both the *B. subtilis* and *S. marcescens* cultures were also  
161 frozen at -80°C as the ancestral populations for later evolutionary comparisons.  
162 Microcosms were left for 24 hr at 37 °C to facilitate growth of the bacteria prior to  
163 addition of the phage. 1 ml of a 10<sup>-3</sup> dilution (in sterile Phosphate Buffer Saline  
164 [PBS]) of the phage stock solution ( $1.7 \times 10^4$  pfu ml<sup>-1</sup>) was added to each microcosm  
165 as required. Microcosms were then left for a further 24 hr at 37 °C to facilitate  
166 bacterial growth and ensure sufficient numbers before the addition of the  
167 bacterivorous *P. caudatum*. Microcosms were inoculated with washed *P. caudatum*  
168 (approx. 50-70 individuals), as required for experimental treatments and allowed to  
169 settle for two days at 22 °C.

170

### 171 *Community sampling and population density measurements*

172 The point of addition of the predators is considered as Day 0 of the experiment which

173 then ran for ten days. Samples of bacteria, phage and protists were taken every day  
174 for the duration of the experiment after carefully homogenising microcosms by  
175 shaking. A 0.1 ml sample was taken to count protist numbers using stereo (Olympus  
176 SZX9) and compound (Olympus BX60) microscopes. Bacterial densities were  
177 measured through direct colony counts (identified by colony morphology) on plates  
178 from appropriately diluted samples. Phage numbers were measured through direct  
179 plaque counts on plates from appropriately diluted samples. Prior to plating, 3 ml of  
180 standard TY medium was inoculated with a stock of ancestral *B. subtilis* and  
181 incubated at 37 °C for a minimum of 4 hr or until an OD<sub>600</sub> of 0.9-1.0 was achieved;  
182 200 µl of the *B. subtilis* culture was added to 10 ml tubes followed by 200 µl of the  
183 microcosm sample, mixed gently by hand and incubated at 37 °C for 15 min. Next, 3  
184 ml of soft agar (0.5%) were added to each tube, swirled, and then poured onto pre-  
185 set 1.5% TY agar plates and incubated overnight at 37 °C. The number of plaques  
186 on each plate was then counted.

187

### 188 ***Measuring evolutionary changes in the life-history traits of focal species B.***

#### 189 ***subtilis***

190 Eight colonies of *B. subtilis* were isolated from each microcosm via agar plating on  
191 the final day of the experiment after microcosms were homogenised and vortexed to  
192 strip biofilm and ensure representative sampling. The resistance of *B. subtilis* was  
193 then assessed against the ancestral populations of SPP1 phage ( $n = 8$  populations  
194 per microcosm), ancestral *S. marcescens* competitor ( $n = 3$  populations per  
195 microcosm) and ancestral predatory *P. caudatum* ( $n = 3$  populations per microcosm).

196

#### 197 ***Competitive ability***



198 The competitive ability of *B. subtilis* from each treatment against the ancestral  
199 competitor *S. marcescens* was assessed in direct competition as a deviation from an  
200 initial 50:50 abundance ratio in co-culture experiments in 96-well plates containing  
201 200 µl of microcosm medium over a 24 hr period at 22 °C. This was accomplished  
202 through counting proportions of the two bacteria based on differences in colony  
203 morphologies.

204

#### 205 *Predator defence*

206 The strength of predator defence evolution of *B. subtilis* from each treatment was  
207 assessed through biofilm formation in 96 well-plates, which is frequently used as a  
208 proxy of bacterial defence strategy based on bacterial cell aggregates that cannot be  
209 consumed by protists because they are too large or attached to surfaces [Böhme  
210 2009; Chavez-Dozal 2012; Friman 2015]. To this end, evolved and ancestral  
211 *Bacillus* bacteria were grown over 24 hr in 96-well plates containing 200 ml of  
212 microcosm medium at 22°C with the addition of approximately 10 washed *P.*  
213 *caudatum* cells. At the end of the 24 hr, *P. caudatum* cell number was counted and  
214 biofilm assays were done to test predator defence [Böhme 2009; Chavez-Dozal  
215 2012; Friman 2015] as follows. The liquid medium was decanted and all unattached  
216 cells were removed through a water rinse. Next, 100 µl of a 0.1% crystal violet  
217 solution was added to the wells to stain the biofilm attached on microplate well walls.  
218 The wells were then left for 15 min and rinsed with deionised water. Plates were left  
219 to dry overnight before 125 µl of 30% acetic acid (in water) were added to each of  
220 the wells and incubated at room temperature for 15 minutes to solubilize the crystal  
221 violet. The supernatant from each well was then transferred to wells in a new plate

222 and biofilm production was quantified by measuring the absorbance at 540 nm using  
223 30% acetic acid as the blank.

224

### 225 *Parasite defence*

226 We used short-term growth assays in liquid media to assess the resistance of *B.*  
227 *subtilis* populations to the ancestral SPP1 phage [Moulton-Brown 2018]. To this end,  
228 10 µl of evolved *B. subtilis* isolates from each treatment was added to 200 µl  
229 microcosm media in 96-well plates and allowed to grow independently for 20 hr at  
230 22°C in both the presence and absence of 10 µl of the ancestral SPP1 phage ( $10^{-4}$   
231 titre). Bacterial density was then quantified by measuring the OD<sub>600</sub> to attain a proxy  
232 of parasite resistance (the higher the OD, the higher the phage resistance).  
233 Resistance was thus measured as reduction in density due to the parasite compared  
234 to when the *B. subtilis* populations were grown alone without the parasite.

235

### 236 *Growth assays of B. subtilis*

237 We compared the growth of evolved and ancestral *B. subtilis* isolates to assess  
238 whether the populations from different ecological contexts differed in their adaptation  
239 to the growth medium [Scanlan 2015], or if adaptations against different enemies  
240 might have incurred costs in terms of trade-offs with growth [Friman 2014; 2015;  
241 2016]. We measured differences in two bacterial growth parameters that are  
242 indicative of their ability to compete for resources: maximum growth (population  
243 density after 15 hr of growth, by which time they had reached stationary phase), and  
244 maximum growth rate (i.e. maximum rate of population growth per hour). Briefly,  
245 ancestral and evolved *B. subtilis* isolates were grown independently over a 15-hour

246 period (OD<sub>600</sub> measured at 10 minute intervals) in the microcosm medium using 96-  
247 well plates to assess differences in growth parameters.

248

### 249 ***Statistical analyses***

250 All densities were log (x+1) transformed prior to analysis to reduce bias caused by  
251 different population sizes. Repeated measures analysis of variance (ANOVA) was  
252 used to assess population density changes in each of *B. subtilis*, *S. marcescens*, *P.*  
253 *caudatum* and SPP1 phage according to community complexity with post-hoc Tukey  
254 honest significant difference (HSD) tests to highlight specific differences among  
255 treatments. ANOVA and *t*-tests were used to examine the evolution of resistance in  
256 *B. subtilis* isolates from each of our microcosm communities against each of the  
257 competitor (based on density ratios), predator (biofilm density) and parasite (based  
258 on density). Finally we used one-sample *t*-tests to test whether the ecological or  
259 evolutionary outcomes from two-species communities could reliably predict the  
260 outcomes in more complex communities. . Predicted values were calculated as the  
261 mean ( $\pm$  s.e.) across antagonist monoculture treatments; For example, the predicted  
262 value for the competitor + parasite treatment was estimated by merging the  
263 competitor alone and parasite alone treatments and calculating their combined  
264 mean. All analyses were carried out in R (version 3.4.4; R Developmental Core  
265 Team 2018). All data available as supplementary files.

266

267

## 268 **Results**

269

270 *Population density dynamics of B. subtilis focal species*

271 The density of *B. subtilis* varied significantly with the number of enemy species  
272 present in the community (repeated measures ANOVA:  $F_{2, 46} = 8.07$ ,  $P < 0.01$ ; Figure  
273 1). Though addition of a second enemy did not alter the density of *B. subtilis* (Tukey  
274 contrasts: 2 enemies present – 1 enemy present;  $P = 0.25$ ; Figure 1), regardless of  
275 antagonist identity (Table S1), *B. subtilis* densities were significantly lower when all  
276 three antagonistic species were present together in the community (Tukey contrasts:  
277 3 enemies present – 1 enemy present;  $P < 0.05$ , 3 enemies present – 2 enemies  
278 present;  $P < 0.05$ ; Figure 1). The observed density of *B. subtilis* in multispecies  
279 communities was consistently lower than that predicted based on densities observed  
280 in two species co-cultures (Table S1; Figure 3a). Together, these results  
281 demonstrate that pairwise communities did not predict the density regulation effects  
282 observed in the three-enemy community.

283

#### 284 *Population density dynamics of competitor, parasite and predator*

285 The bacterial competitor species *S. marcescens* reached higher population densities  
286 compared to *B. subtilis* when co-cultured in the absence of other antagonists (Figure  
287 1a). This is indicative of competitive advantage. However, when either the specialist  
288 parasite of *B. subtilis* (phage SPP1), a generalist predator species (*P. caudatum*), or  
289 both, were added to the microbial community, this competitive advantage was  
290 diminished, as evinced in a greater reduction in *S. marcescens* relative to *B. subtilis*  
291 densities (repeated measures ANOVA:  $F_{2, 25} = 10.34$ ,  $P < 0.001$ ; Tukey contrasts; 2  
292 enemies – 1 enemy and 3 enemies – 1 enemy,  $P < 0.05$  in all cases; Figure 1). This  
293 suggests that the presence of parasites and predators, either separately or together,  
294 evened out the competitive difference between the two competing bacterial species.

295

296 Parasite densities varied with community richness (repeated measures ANOVA:  $F_{2,25} = 4.1$ ,  $P < 0.05$ ). Parasite density was unaffected by the presence of other  
297 antagonists (Tukey contrasts: 3 enemies – parasite,  $P = 0.8$ ; 2 enemies– parasite,  $P = 0.1$ ; Figure 1b, g), except in the presence of both the competitor and predator of *B.*  
298 *subtilis*, which decreased parasite density relative to either species present in  
299 isolation (Tukey contrasts: 3 enemies – 2 enemies,  $P < 0.05$ ; Figure 1). Parasite  
300 densities dropped below the detectable limit by the end of the experiment (Figure 1g)  
301 in the presence of both competitor and predator (Tukey contrasts: All species  
302 present – every other parasite treatment,  $P < 0.05$  in all cases; Figure 1). This  
303 suggests that the competitor and predator had relatively small effects on parasite  
304 densities in communities containing two enemies but additive negative effects in  
305 three-antagonist communities.  
306  
307

308  
309 Although predator densities in general increased over time, they did not vary with  
310 antagonist richness (repeated measures ANOVA,  $F_{2,25} = 0.63$ ,  $P = 0.5$ ; Figure 1).  
311 Thus, the predator was the least affected by the presence of other interacting  
312 antagonistic species in the community.  
313

#### 314 *Evolution of B. subtilis competitive ability and resistance against parasite and* 315 *predator*

316 Evolutionary change in the competitive ability of *B. subtilis* was assessed by  
317 comparing the growth of ancestral and evolved *B. subtilis* clones in direct  
318 competition with the ancestral competitor species, *S. marcescens*, at the end of the  
319 experiment. We found that the competitive ability of *B. subtilis* increased only if it had  
320 been exposed to *S. marcescens* in the absence of other antagonists (Figure 2a;

321 ANOVA:  $F_{6, 19} = 4.58$ ,  $P = 0.005$ ; Tukey contrasts;  $P < 0.05$  for each treatment  
322 compared to *B. subtilis* + *S. marcescens* alone, except for *B. subtilis* + SPP1 phage  
323 parasite, where  $P = 0.08$ ). The presence of any other enemy limited the evolution of  
324 *B. subtilis* competitive ability and no difference was observed relative to the ancestral  
325 strain (Tukey HSD;  $P > 0.05$  between all other treatment pairs, Figure 2a). The  
326 observed changes in *B. subtilis* competitive ability were lower than predicted based  
327 on pairwise co-cultures, except for the predator-parasite treatment (Table S1; Figure  
328 3b). These results therefore indicate that evolutionary changes in *B. subtilis*  
329 competitive ability were weakened in the presence of additional species.

330

331 Evolution of resistance to the parasite was measured as the difference in the growth  
332 of ancestral and evolved *B. subtilis* isolates in the presence and absence of the  
333 ancestral SPP1 phage (Figures 2b, S1). Overall, resistance to the ancestral parasite  
334 varied strongly depending upon community composition (ANOVA:  $F_{6, 38} = 7.46$ ,  $P <$   
335  $0.001$ ; Figure 2b). Prior exposure to the parasite alone did not affect *B. subtilis*  
336 resistance to the ancestral parasite ( $t$ -test;  $t_{8,14} = 0.98$ ,  $P = 0.35$ ; Figure 2b, S1). In  
337 contrast, the correlated evolutionary response to *S. marcescens* alone led to high  
338 ancestral parasite resistance ( $t$ -test;  $t_{7,3} = 5.1$ ,  $P = 0.001$ ; Figures 2b, S1), while this  
339 effect disappeared with the addition of other antagonists ( $t$ -tests; parasite:  $t_{11,03} =$   
340  $0.57$ ,  $P = 0.58$ ; predator:  $t_{9,9} = 0.74$ ,  $P = 0.48$ ; Figures 2b, S1). Moreover, prior  
341 exposure to the predator alone ( $t$ -test;  $t_{8,89} = -3.7$ ,  $P < 0.01$ ; Figures 2b, S1), or in  
342 combination with the phage parasite ( $t$ -test;  $t_{9,52} = 8.58$ ,  $P < 0.001$ ; Figures 2b, S1),  
343 reduced *B. subtilis* resistance to the parasite. When all three enemy species were  
344 present together, there was no effect on *B. subtilis* resistance to the ancestral SPP1  
345 parasite ( $t$ -test;  $t_{9,99} = 1.27$ ,  $P = 0.23$ ; Figures 2b, S1). No major differences were

346 observed between predicted and observed parasite resistance values largely  
347 because only weak parasite resistance was observed in general (Figure 3).  
348 However, when both predator and parasite were present together, the resistance of  
349 *B. subtilis* was lower than expected based on pairwise co-culture predictions (Table  
350 S1; Figure 3c). Together, these results suggest that both competitors and predators  
351 exerted opposing, correlated selection for *B. subtilis* parasite resistance and that  
352 they cancelled the effect of each other out in competitor-predator co-cultures.

353

354 Resistance to the predatory protist *P. caudatum* was measured as the difference in  
355 the extent of biofilm formation between ancestral and evolved *B. subtilis* isolates in  
356 the presence and absence of a stock culture of *P. caudatum*. As expected, all  
357 isolates produced a greater amount of biofilm in the presence of the predator  
358 (Figures 2c, S2). However, all evolved isolates produced less biofilm than the  
359 ancestral *B. subtilis* strain in the presence of the predator (grey line on Fig 2c), and  
360 no difference in biofilm formation was observed between evolved isolates from  
361 different antagonist communities (ANOVA:  $F_{5, 34} = 0.77$ ,  $P = 0.58$ ; Figures 2c, S2).  
362 As a result, only weak predator resistance evolution and a good agreement between  
363 predicted and observed evolutionary outcomes was observed, except for the  
364 competitor-predator treatment, where observed evolutionary changes were less than  
365 those predicted (Table S1; Figure 3d).

366

### 367 *Determining B. subtilis adaptation to the growth media and the cost of resistance*

368 We quantified the growth of ancestral vs. evolved *B. subtilis* isolates to assess  
369 whether populations from different antagonist communities differed in their  
370 adaptation to the growth medium and to identify the potential cost of resistance.

371 None of the evolved selection lines showed improved growth relative to the ancestral  
372 *B. subtilis* strain, which suggests that no adaptation to the growth media occurred  
373 and that changes are likely due to some costs of resistance (Figure S3a). The  
374 maximum population density of evolved *B. subtilis* isolates was unaffected by  
375 previous evolutionary history with either the competitor *S. marcescens* or parasite  
376 (ANOVA; main effect of *S. marcescens*:  $F_{1,38} = 0.64$ ,  $P = 0.43$ ; main effect of SPP1  
377 phage:  $F_{1,38} = 1.5$ ,  $P = 0.23$ ; Figure S3a). The maximum population density of *B.*  
378 *subtilis* was, however, reduced significantly if it had previously been exposed to  
379 antagonist communities that included the predator (ANOVA; main effect of *P.*  
380 *caudatum*:  $F_{1,38} = 36.12$ ,  $P < 0.001$ ; Figure S3a), and this reduction was the  
381 strongest in the predator-parasite treatment. In line with this, the observed maximum  
382 densities were lower than predicted in more complex communities that included the  
383 predator (Table S1; Figure 3e).

384  
385 The growth rate of evolved *B. subtilis* isolates was much lower compared to the  
386 ancestral strain (Figure S3b) and only *B. subtilis* that had evolved in the presence of  
387 all three enemies had growth rates comparable with the ancestral strain. In general,  
388 reduction in *B. subtilis* growth rate was lower in antagonist communities that included  
389 the *S. marcescens* competitor species (ANOVA; main effect of *S. marcescens*:  $F_{1,38}$   
390  $= 16.44$ ,  $P < 0.001$ ; Tukey contrasts  $P < 0.05$ ; Figure S3b) and *P. caudatum* predator  
391 (ANOVA; main effect of *P. caudatum*:  $F_{1,38} = 8.21$ ,  $P = 0.007$ ; Tukey contrasts  $P <$   
392  $0.05$ ; Figure S3b). In contrast, the presence of the SPP1 phage parasite had no clear  
393 effect on *B. subtilis* growth rate (ANOVA; main effect of SPP1 phage:  $F_{1,38} = 2.54$ ,  $P$   
394  $= 0.12$ ; Figure S3b). Due to similar evolutionary trajectories in pairwise co-cultures,  
395 good agreement was found between predicted and observed evolutionary outcomes



396 (Figure 3). However, the observed reduction in *B. subtilis* growth rate was much less  
397 than predicted in the three-antagonist community (Table S1; Figure 3f). Together,  
398 these results suggest that evolved isolates had generally lowered maximum growth  
399 and growth rates compared to the ancestral strain and that these changes were  
400 driven mainly by the presence of the predator.

401

402

### 403 **Discussion**

404

405 In this study, we set out to test whether pairwise interactions observed both within  
406 and among trophic levels scale with increasing complexity in multitrophic microbial  
407 communities. We found that, while increasing the number of enemies in a community  
408 had an overall negative effect on the densities of our focal bacterium, *B. subtilis*, only  
409 the competitor imposed direct selection for *B. subtilis* trait evolution in pairwise  
410 cultures. Further, this effect was weakened in the presence of other antagonists that  
411 had a negative effect on the competitor. As a result, ecological (population density)  
412 and evolutionary (trait evolution) outcomes were coupled only in the case of *B.*  
413 *subtilis* competitive ability. However, both predators and parasites affected *B. subtilis*  
414 trait evolution indirectly in antagonist co-cultures, having either positive or negative  
415 effects respective to the ancestral strain. In case of both ecological and evolutionary  
416 outcomes, selection in pairwise communities was a poor predictor of outcomes in  
417 more complex communities, and often led to overpredictions. Overall, our findings  
418 indicate that the coupling of eco-evolutionary outcomes is both trait- and interaction-  
419 specific and harder to predict in more complex communities where the increasing

420 number of trait correlations can mask weak ecological signals and alter predictions  
421 based on pairwise co-cultures.

422

423 Only the competitor bacterium *S. marcescens* selected for clear evolutionary change  
424 in *B. subtilis* in single-enemy monocultures. Under experimental conditions, *S.*  
425 *marcescens* attained higher densities than *B. subtilis*, indicating a competitive  
426 advantage. This manifested as a strong driving force for evolutionary change in *B.*  
427 *subtilis*, where isolates from the competitor monoculture treatment demonstrated  
428 much greater competitive ability towards their ancestral competitor in comparison to  
429 both ancestral *B. subtilis* and evolved *B. subtilis* isolated from multi-enemy co-  
430 cultures. In contrast, neither the parasitic phage nor predatory protist caused such a  
431 magnitude of evolutionary change against ancestral enemies in *B. subtilis*. One  
432 explanation for this is that the duration of the experiment (10 days) was not  
433 sufficiently long for the resistance to sweep through *B. subtilis* bacterial populations  
434 and become fixed. Also, the nutrient concentration of our experimental conditions  
435 was relatively low, which has been shown previously to slow down both parasite  
436 [Friman 2015] and predator [Friman 2011] resistance evolution. In the case of  
437 predator resistance evolution, we observed a very strong plastic defence response,  
438 which decreased with evolved compared to ancestral *B. subtilis* strains. While this is  
439 indicative of defence evolution, it was uniform among antagonist treatments,  
440 suggesting that it was perhaps driven independent of the presence of the predator  
441 (e.g. adaptation to growth media). It is less clear why no clear signs of parasite  
442 resistance were observed. It is possible that *B. subtilis* evolved resistance to its  
443 contemporary parasite without clear effects on resistance to the ancestral parasite.  
444 Also, phage densities were quite low in our experimental system, which could also

445 have reduced the likelihood of resistance evolution [Lopez-Pascua 2008; Friman  
446 2008].

447

448 The observed competitive advantage and selective force of the competitor bacterium  
449 on *B. subtilis* was weakened substantially in the presence of other enemies. The  
450 presence of either predator or parasite, alone or in combination, led to a reduction in  
451 *S. marcescens* density, negating the effect of the competitor on driving selection in  
452 *B. subtilis* competitive ability. Alternatively, it is possible that selection by parasites or  
453 predators somehow conflicted with the selection by competitors. For example, the  
454 presence of multiple enemies can weaken the respective effects via trade-offs where  
455 selection by one antagonist makes the focal species more susceptible to the other  
456 antagonists [Friman 2009]. This is, however, an unlikely explanation in our study, as  
457 selection by the competitor alone did not make *B. subtilis* more susceptible to the  
458 predator or parasite.

459

460 We found no evidence of evolutionary change in *B. subtilis* response to either  
461 predator or parasite in monocultures. In contrast, adaptation to the parasitic  
462 bacteriophage was driven indirectly by selection in multispecies communities, where  
463 the presence of competitors had a positive, and predators a negative, effect. The  
464 density of parasites was lowest in the presence of both other antagonists but this  
465 does not appear to have altered the strength of their evolutionary selective pressure  
466 on *B. subtilis*. This implies that adaptations conferring a competitive advantage  
467 against *S. marcescens* also conferred a level of resistance against bacteriophage  
468 SPP1. There are several potential mechanisms through which bacteria may develop  
469 resistance against both a competitor and a bacteriophage parasite simultaneously.

470 For instance, the production of extra-cellular compounds – including matrices and  
471 competitive inhibitors– are known to confer both competitive advantages [Hibbing  
472 2010] and resistance [Labrie 2010] against host-specific bacteriophage parasites.  
473 Only plastic defensive response to predation through biofilm production was  
474 observed and this was not affected by antagonist community composition. When  
475 both competitor and predator were present together, with or without the parasite, the  
476 resistance of *B. subtilis* to the ancestral parasite was similar to that of the ancestral  
477 *B. subtilis*. As the predator appeared to feed non-preferentially on all bacteria  
478 present, it had a negative effect on the densities of both *B. subtilis* and *S.*  
479 *marcescens*, which likely evened out some of the competitive interactions between  
480 the two species. In addition, it is likely, though not directly measured here, that  
481 predation selected for *S. marcescens* defence evolution which may have altered  
482 competitive interactions between the bacteria [Hiltunen 2017]. Together, these  
483 results suggest that competitors and predators impose opposing selection but that,  
484 when present in the community together, cancel each other out indicative of cryptic  
485 evolution [Yoshida 2007].  
486  
487 Our focal bacterium, *B. subtilis*, adapted differentially to the growth media depending  
488 on the species that it was co-cultured with. The presence of single enemies did not  
489 increase or reduce the maximum growth obtained by the *B. subtilis* populations  
490 relative to their ancestral strain. This implies that changes in maximum growth would  
491 likely be due to costs of resistance against multiple enemies. However, the presence  
492 of predator and phage together, with or without the competitor, led to lowered  
493 maximum growth. This suggests that the predators and parasites had additive  
494 negative effects on the growth of the bacterium. We also found that all populations of

495 single- or two-enemy communities had lower growth rates than the ancestral strain.  
496 In contrast, the presence of all three enemies at once led to increased growth rates  
497 in the growth medium relative to the other populations. It has been shown previously  
498 that evolution of defensive traits can impose costs in terms of reduced growth rates  
499 [Ford 2016; Ashby 2017]. The effects of community complexity on a given species  
500 depend upon the growth environment that they find themselves in, how each species  
501 is adapted to it and, thus, the relative costs of defensive resistance evolution.  
502 However, we found that resistance evolution did not increase clearly with community  
503 complexity and is thus unlikely to explain the lowest growth rate cost in the most  
504 complex community.

505

506 Neither the ecological nor the evolutionary outcomes of our focal bacterium *B.*  
507 *subtilis* could be predicted reliably based on pairwise interactions. We found that  
508 observed densities of *B. subtilis* populations in complex communities were  
509 consistently lower than predicted from pairwise cultures across all treatments. This is  
510 suggestive of synergistic interactions among enemy communities. Similarly, the  
511 evolutionary outcomes of *B. subtilis* were more varied and often in disagreement  
512 between observed and predicted outcomes in general. However, these mismatches  
513 depended upon the composition of specific enemy communities and the given traits  
514 measured. Most of the discrepancies between predicted and observed evolutionary  
515 outcomes were associated with competitive ability and the growth parameters of our  
516 evolved isolates, while no clear pattern was found with increasing community  
517 complexity. The greatest magnitude of evolutionary response in monoculture was  
518 observed with the competitor bacterium *S. marcescens*, an effect which was no  
519 longer observed with increasing complexity. This could suggest that the greater the

520 magnitude of pairwise interactions, the greater the extent that increased complexity  
521 will modify that response in natural communities.

522

523 The coupling of eco-evolutionary outcomes were also trait-specific: evolutionary  
524 changes in the competitive ability of *B. subtilis* were linked strongly with ecological  
525 dynamics, whereas the evolution of parasite resistance did not exert a clear  
526 ecological signal. When species are dealing with a single or few strong interactions it  
527 might be expected that ecological dynamics are tightly coupled with evolutionary  
528 trajectories, such that relative species densities may indicate the strength of  
529 selection. Ecological parameters such as biomass are frequently used to elucidate  
530 shifts in evolutionary outcomes (such as changes in the ability to resist parasites)  
531 within populations [Yoshida 2007]. Shifts in a population's evolutionary strategy in  
532 terms of growth rates and resistance to enemies have the potential to greatly alter  
533 the ecological interactions within a community. Detecting such evolutionary signals  
534 of change within a population in different ecological contexts is of great importance  
535 for predicting the impact of changing environments and biodiversity loss. When  
536 considering the impact of global change on species evolution, our results suggest  
537 that competitive interactions may play a far stronger role than appreciated  
538 previously. Competition in microbial communities is a known driver of many species  
539 traits [Schutler 2015; Ashby 2017; Niehus 2017] and our study shows that  
540 exploitative competitive interactions may be even more important for predicting  
541 responses to other biotic stressors than strong trophic interactions.

542

543 In conclusion, our findings demonstrate that predicting ecological and evolutionary  
544 dynamics of complex systems based on pairwise interactions is extremely

545 challenging. If we are to better predict eco-evolutionary outcomes in large  
546 multispecies ecosystems, we must endeavor to scale up empirical experiments to  
547 incorporate a greater range of more realistic interaction networks, incorporating  
548 multiple trophic levels. Moreover, our results suggest that selection in one context  
549 can have unexpected consequences for species interactions in another context due  
550 to negative and/or positive trait correlations. It is thus crucial to try to understand  
551 targets of selection more mechanistically in order to predict how different selection  
552 pressures might shape species evolution in complex communities. Incorporating  
553 these approaches into current eco-evolutionary dynamics frameworks will help to  
554 achieve much greater insight into the evolution and mechanisms of trait correlations  
555 and, therefore, enhance our capacity to understand and predict species response to  
556 global change in complex communities.

557

558

559 **References:**

560

- 561 1. Ackerly DD, Cornwell WK. 2007. A trait-based approach to community  
562 assembly: partitioning of species trait values into within-and among-  
563 community components. *Ecology letters*. **10**(2):135-45.
- 564
- 565 2. Ashby B, Watkins E, Lourenço J, Gupta S, Foster KR. 2017. Competing  
566 species leave many potential niches unfilled. *Nature Ecology & Evolution*.  
567 **1**(10), 1495.

568

- 569 3. Banerji, A. et al. 2015. Density-and trait-mediated effects of a parasite and a  
570 predator in a tri-trophic food web. *Journal of Animal Ecology* **84**, 723–733.  
571
- 572 4. Barraclough TG. 2015. How do species interactions affect evolutionary  
573 dynamics across whole communities?. *Annual Review of Ecology, Evolution,*  
574 *and Systematics* **46**, 25-48.  
575
- 576 5. Betts MG, Hadley AS, Kress WJ. 2015. Pollinator recognition by a keystone  
577 tropical plant. *Proceedings of the National Academy of Sciences*. **112**(11),  
578 3433-8.  
579
- 580 6. Böhme A, Risse-Buhl U, Küsel K. 2009. Protists with different feeding modes  
581 change biofilm morphology. *FEMS Microbiology Ecology* **69**(2), 158-169.  
582
- 583 7. Chamberlain SA, Bronstein JL, Rudgers JA. 2014. How context dependent  
584 are species interactions?. *Ecology letters* **17**(7), 881-90.  
585
- 586 8. Chavez-Dozal A, Gorman C, Erken M, Steinberg PD, McDougald D, &  
587 Nishiguchi MK. 2012. Predation response of *Vibrio fischeri* biofilms to  
588 bacterivorous protists/phagotrophic protozoa. *Applied and Environmental*  
589 *Microbiology* AEM-02710.  
590
- 591 9. Collins S. 2011. Competition limits adaptation and productivity in a  
592 photosynthetic alga at elevated CO<sub>2</sub>. *Proceedings of the Royal Society of*  
593 *London B: Biological Sciences* **278**(1703), 247-55.



594

595 10. De Mazancourt C, Johnson E, Barraclough TG. 2008. Biodiversity inhibits  
596 species' evolutionary responses to changing environments. *Ecology Letters*  
597 **11**(4), 380-8.

598

599 11. Donohue I, Hillebrand H, Montoya JM, Petchey OL, Pimm SL, Fowler MS,  
600 Healy K, Jackson AL, Lurgi M, McClean D, O'Connor NE. 2016. Navigating  
601 the complexity of ecological stability. *Ecology letters* **19**(9), 1172-85.

602

603 12. Estes JA, Terborgh J, Brashares JS, Power ME, Berger J, Bond WJ,  
604 Carpenter SR, Essington TE, Holt RD, Jackson JB, Marquis RJ. 2011.  
605 Trophic downgrading of planet Earth. *Science* **333**(6040), 301-6.

606

607 13. Friman VP, Hiltunen T, Laakso J, Kaitala V. 2008. Availability of prey  
608 resources drives evolution of predator–prey interaction. *Proceedings of the*  
609 *Royal Society of London B: Biological Sciences* **275**(1643), 1625-33.

610

611 14. Friman VP, Lindstedt C, Hiltunen T, Laakso J, Mappes J. 2009. Predation on  
612 multiple trophic levels shapes the evolution of pathogen virulence. *PloS one*.  
613 **4**(8), e6761.

614

615 15. Friman VP & Laakso J. 2011. Pulsed-resource dynamics constrain the  
616 evolution of predator-prey interactions. *The American Naturalist* **177**(3), 334-  
617 345.

618

- 619 16. Friman VP, Buckling A. 2013. Effects of predation on real-time host–parasite  
620 coevolutionary dynamics. *Ecology letters* **16**(1), 39-46.  
621
- 622 17. Friman VP, Jousset A, Buckling A. 2014. Rapid prey evolution can alter the  
623 structure of predator–prey communities. *Journal of Evolutionary Biology* **27**(2),  
624 374-80.  
625
- 626 18. Friman, VP, Guzman LM, Reuman DC, and Bell T. 2015. Bacterial adaptation  
627 to sublethal antibiotic gradients can change the ecological properties of  
628 multitrophic microbial communities. *Proceedings of the Royal Society of  
629 London B: Biological Sciences* **282**(1806), 20142920.  
630
- 631 19. Friman VP, Dupont A, Bass D, Murrell DJ, Bell T. 2016. Relative importance  
632 of evolutionary dynamics depends on the composition of microbial predator–  
633 prey community. *ISME* **10**(6), 1352.  
634
- 635 20. Ford SA, Kao D, Williams D, & King KC. 2016. Microbe-mediated host  
636 defence drives the evolution of reduced pathogen virulence. *Nature  
637 Communications* **7**, 13430.  
638
- 639 21. Foster KR, Bell T. 2012. Competition, not cooperation, dominates interactions  
640 among culturable microbial species. *Current biology* **22**(19), 1845-50.  
641
- 642 22. Garland T. 2014. Trade-offs. *Current Biology*. **24**(2), R60-1.  
643

- 644 23. Gause GF. 1934. Experimental analysis of Vito Volterra's mathematical theory  
645 of the struggle for existence. *Science* **79**(2036), 16-7.  
646
- 647 24. Ghoul M, West SA, Johansen HK, Molin S, Harrison OB, Maiden MC, Jelsbak  
648 L, Bruce JB, Griffin AS. 2015. Bacteriocin-mediated competition in cystic  
649 fibrosis lung infections. . *Proceedings of the Royal Society of London B:*  
650 *Biological Sciences* **282**(1814), 20150972  
651
- 652 25. Hardin G. 1960. The competitive exclusion principle. *Science*. **131**(3409),  
653 1292-7.  
654
- 655 26. Hibbing ME, Fuqua C, Parsek MR, Peterson SB. 2010. Bacterial competition:  
656 surviving and thriving in the microbial jungle. *Nature Reviews Microbiology*.  
657 **8**(1),15.  
658
- 659 27. Hiltunen T, Kaitala V, Laakso J, Becks L. 2017. Evolutionary contribution to  
660 coexistence of competitors in microbial food webs. . *Proceedings of the Royal*  
661 *Society of London B: Biological Sciences* **284**(1864), 20170415.  
662
- 663 28. Hudson PJ, Dobson AP, Lafferty KD. 2006. Is a healthy ecosystem one that is  
664 rich in parasites?. *Trends in ecology & evolution* **21**(7), 381-5.  
665
- 666 29. Johnson, W. H. 1936. Studies on the nutrition and reproduction of  
667 *Paramecium*. *Physiological Zoology* **9**, 1–14.  
668

- 669 30. Johnson MT, Stinchcombe JR. 2007. An emerging synthesis between  
670 community ecology and evolutionary biology. *Trends in ecology & evolution*.  
671 **22**(5), 250-7.  
672
- 673 31. Koskella B, Lin DM, Buckling A, Thompson JN. 2011. The costs of evolving  
674 resistance in heterogeneous parasite environments. *Proceedings of the Royal*  
675 *Society of London B: Biological Sciences*, rspb20112259.  
676
- 677 32. Koskella B, Brockhurst MA 2014. Bacteria–phage coevolution as a driver of  
678 ecological and evolutionary processes in microbial communities. *FEMS*  
679 *Microbiology Reviews* **38**(5), 916-31.  
680
- 681 33. Kutz SJ, Hoberg EP, Polley L, Jenkins EJ. 2005. Global warming is changing  
682 the dynamics of Arctic host–parasite systems. *Proceedings of the Royal*  
683 *Society of London B: Biological Sciences* **272**(1581), 2571-6.  
684
- 685 34. Labrie SJ, Samson JE, Moineau S. 2010. Bacteriophage resistance  
686 mechanisms. *Nature Reviews Microbiology* **8**(5), 317.  
687
- 688 35. Lawrence D, Fiegna F, Behrends V, Bundy JG, Phillimore AB, Bell T,  
689 Barraclough TG. 2012. Species interactions alter evolutionary responses to a  
690 novel environment. *PLoS biology* **10**(5), e1001330.  
691
- 692 36. Lawler SP, Morin PJ. 1993. Food web architecture and population dynamics  
693 in laboratory microcosms of protists. *The American Naturalist* **141**(5), 675-86.

694

695 37. Leary DJ, Rip JM, Petchey OL. 2012. The impact of environmental variability  
696 and species composition on the stability of experimental microbial populations  
697 and communities. *Oikos* **121**(3), 327-36.

698

699 38. Loreau M, Mazancourt C. 2013. Biodiversity and ecosystem stability: a  
700 synthesis of underlying mechanisms. *Ecology letters* **16**(s1), 106-15.

701

702 39. Lopez-Pascua L DC, Buckling A. 2008. Increasing productivity accelerates  
703 host–parasite coevolution. *Journal of Evolutionary Biology* **21**(3), 853-60.

704

705 40. Lytle DA. 2001. Disturbance regimes and life-history evolution. *The American*  
706 *Naturalist*. **157**(5), 525-36.

707

708 41. McClean D, McNally L, Salzberg LI, Devine KM, Brown SP, Donohue I. 2015.  
709 Single gene locus changes perturb complex microbial communities as much  
710 as apex predator loss. *Nature communications* **6**, 8235.

711

712 42. MacLean RC, Bell G, Rainey PB. 2004. The evolution of a pleiotropic fitness  
713 tradeoff in *Pseudomonas fluorescens*. *Proceedings of the National Academy*  
714 *of Sciences of the United States of America* **101**(21), 8072-7.

715

716 43. Moulton-Brown CE & Friman VP. 2018. Rapid evolution of generalised  
717 resistance mechanisms can constrain the efficacy of phage-antibiotic  
718 treatments. *Evolutionary Applications* **11**, 1630-1641.

719

720 44. Mrowicki, R.J., O'Connor, N.E. & Donohue, I. 2016. Temporal variability of a  
721 single population can determine the vulnerability of communities to  
722 perturbations. *Journal of Ecology*, **104**, 887-897.

723

724 45. Niehus R, Picot A, Oliveira NM, Mitri S, Foster KR. 2017. The evolution of  
725 siderophore production as a competitive trait. *Evolution* **71**(6), 1443-55.

726

727 46. O'Connor NE, Bracken ME, Crowe TP, Donohue I. 2015. Nutrient enrichment  
728 alters the consequences of species loss. *Journal of Ecology* **103**(4), 862-70.

729

730 47. Penczykowski RM, Laine AL, Koskella B. 2016. Understanding the ecology  
731 and evolution of host–parasite interactions across scales. *Evolutionary*  
732 *applications* **9**(1), 37-52.

733

734 48. Pernthaler J. 2005. Predation on prokaryotes in the water column and its  
735 ecological implications. *Nature Reviews Microbiology* **7**, 537.

736

737 49. Post DM, Palkovacs EP. 2009. Eco-evolutionary feedbacks in community and  
738 ecosystem ecology: interactions between the ecological theatre and the  
739 evolutionary play. *Philosophical Transactions of the Royal Society B:*  
740 *Biological Sciences* **364**(1523), 1629-40.

741

742 50. Ratsak, C., Maarsen, K. & Kooijman, S. 1996. Effects of protozoa on carbon  
743 mineralization in activated sludge. *Water Research* **30**, 1–12.

744

745 51. Rivett DW, Scheuerl T, Culbert CT, Mombrikotb SB, Johnstone E,  
746 Barraclough TG, Bell T. 2016. Resource-dependent attenuation of species  
747 interactions during bacterial succession. *ISME* **10**(9), 2259.

748

749 52. Scanlan PD, Hall AR, Blackshields G, Friman VP, Davis Jr MR, Goldberg JB,  
750 Buckling A. 2015. Coevolution with bacteriophages drives genome-wide host  
751 evolution and constrains the acquisition of abiotic-beneficial mutations.  
752 *Molecular biology and evolution* **32**(6), 1425-35.

753

754 53. Schluter J, Nadell CD, Bassler BL, Foster KR. 2015. Adhesion as a weapon in  
755 microbial competition. *ISME* **9**(1), 139.

756

757 54. Sheldon BC, Verhulst S. 1996. Ecological immunology: costly parasite  
758 defences and trade-offs in evolutionary ecology. *Trends in Ecology &*  
759 *Evolution* **11**(8), 317-21.

760

761 55. Sherr EB, Sherr BF. 2002. Significance of predation by protists in aquatic  
762 microbial food webs. *Antonie van Leeuwenhoek* **81**(1-4), 293-308.

763

764 56. Stearns SC. 1989. Trade-offs in life-history evolution. *Functional Ecology*.  
765 **3**(3), 259-68.

766

767 57. Thompson JN. 1994. The coevolutionary process. University of Chicago  
768 Press.

769

770 58. Thompson JN. 2005. Coevolution: the geographic mosaic of coevolutionary  
771 arms races. *Current Biology* **15**(24), R992-4.

772

773 59. Thurman, J. et al. 2010. The filter-feeding ciliates *Colpidium striatum* and  
774 *Tetrahymena pyriformis* display selective feeding behaviours in the presence  
775 of mixed, equally-sized, bacterial prey. *Protist* **161**, 577–588.

776

777 60. Tollrian R. 1995. Predator-induced morphological defenses: costs, life history  
778 shifts, and maternal effects in *Daphnia pulex*. *Ecology* **76**(6), 1691-705.

779

780 61. Van Buskirk J. 2000. The costs of an inducible defense in anuran larvae.  
781 *Ecology* **81**(10), 2813-21.

782

783 62. Vos M, Birkett PJ, Birch E, Griffiths RI, Buckling A. 2009. Local adaptation of  
784 bacteriophages to their bacterial hosts in soil. *Science* **325**(5942), 833.

785

786 63. Wach A. 1996. PCR-synthesis of marker cassettes with long flanking  
787 homology regions for gene disruptions in *S. cerevisiae*. *Yeast* **12**, 259–265.

788

789 64. Wang X, Wei Z, Li M, Wang X, Shan A, Mei X, Jousset A, Shen Q, Xu Y,  
790 Friman VP. 2017. Parasites and competitors suppress bacterial pathogen  
791 synergistically due to evolutionary trade-offs. *Evolution* **71**(3), 733-46.

792



793 65. Wright IJ, Westoby M. 1999. Differences in seedling growth behaviour among  
794 species: trait correlations across species, and trait shifts along nutrient  
795 compared to rainfall gradients. *Journal of Ecology* **87**(1), 85-97.

796

797 66. Yoshida T, Jones LE, Ellner SP, Fussmann GF, Hairston Jr NG. 2003. Rapid  
798 evolution drives ecological dynamics in a predator–prey system. *Nature*  
799 **424**(6946), 303.

800

801 67. Yoshida T, Ellner SP, Jones LE, Bohannan BJ, Lenski RE, Hairston Jr NG.  
802 2007. Cryptic population dynamics: rapid evolution masks trophic interactions.  
803 *PLoS Biology* **5**(9), e235.

804

805

806

807

808

809

810

**Figures and Legends:**

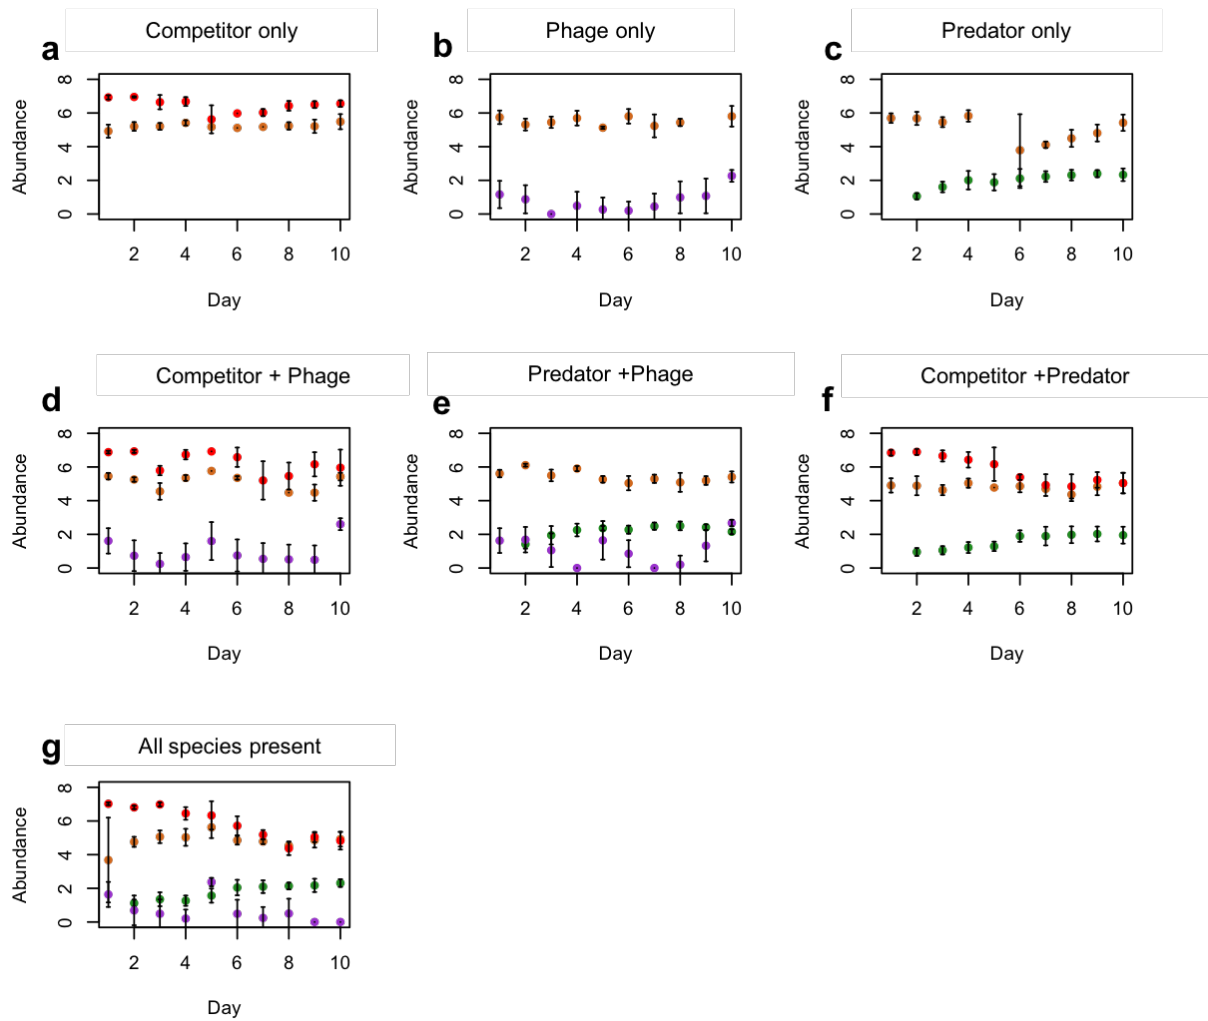

811

812 **Figure 1.** Abundance (log-transformed, mean  $\pm$  std. dev.,  $n = 7$ ) of the focal species

813 *B. subtilis* (orange circles), competitor bacterium *S. marcescens* (red circles),

814 predator *P. caudatum* (green circles) and *B. subtilis*-specific parasite phage SPP1

815 (purple circles) in each treatment over the duration of the experiment (Days 1-10).

816

817

818

819

820

821

### Direction of evolutionary change relative to ancestral *B. subtilis*

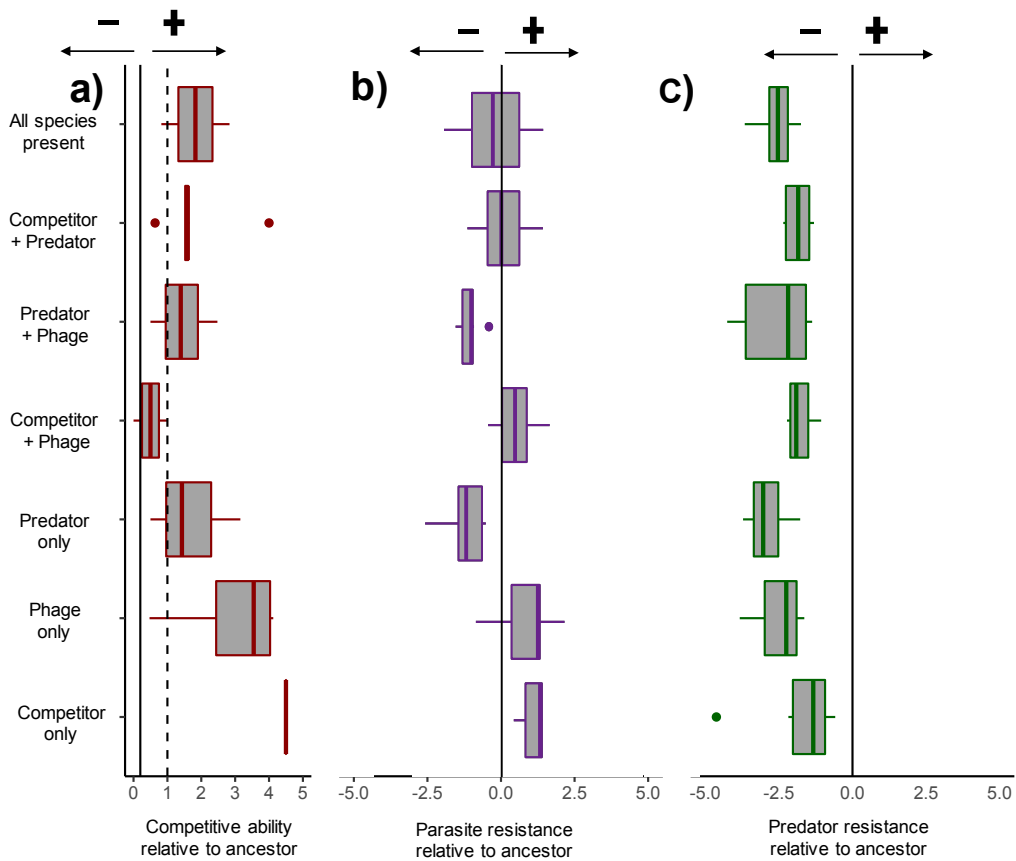

822

823

824 **Figure 2.** The effect of community composition on *B. subtilis* evolution relative to the

825 ancestral strain (solid line). **a.** Competitive ability of *B. subtilis* isolates, measured as

826 the ratio of *B. subtilis* to *S. marcescens* (dashed line indicates a 1:1 ratio, solid line

827 represents ancestral resistance). **b.** Relative resistance to parasite in *B. subtilis*

828 across treatment groups. Resistance to phage SPP1 was measured as the

829 difference in growth (optical density) of *B. subtilis* in the presence or absence of the

830 ancestral phage parasite. The solid line represents the resistance of ancestral *B.*

831 *subtilis* and the resistance of our experimental treatment isolates relative to ancestral

832 parasite resistance. **c.** Growth of *B. subtilis* isolates in the presence of the predator

833 *P. caudatum* (measured as  $\log_{10}$  optical density of biofilm production). Solid line

834 indicates resistance of the ancestral *B. subtilis* grown in the presence of *P.*

835 *caudatum*). In all cases, values to the right of the solid lines indicate higher relative  
836 resistance than the ancestral strain, values to the left of the solid line indicate lower  
837 resistance relative to ancestral strain of *B. subtilis*.

838

839

840

841

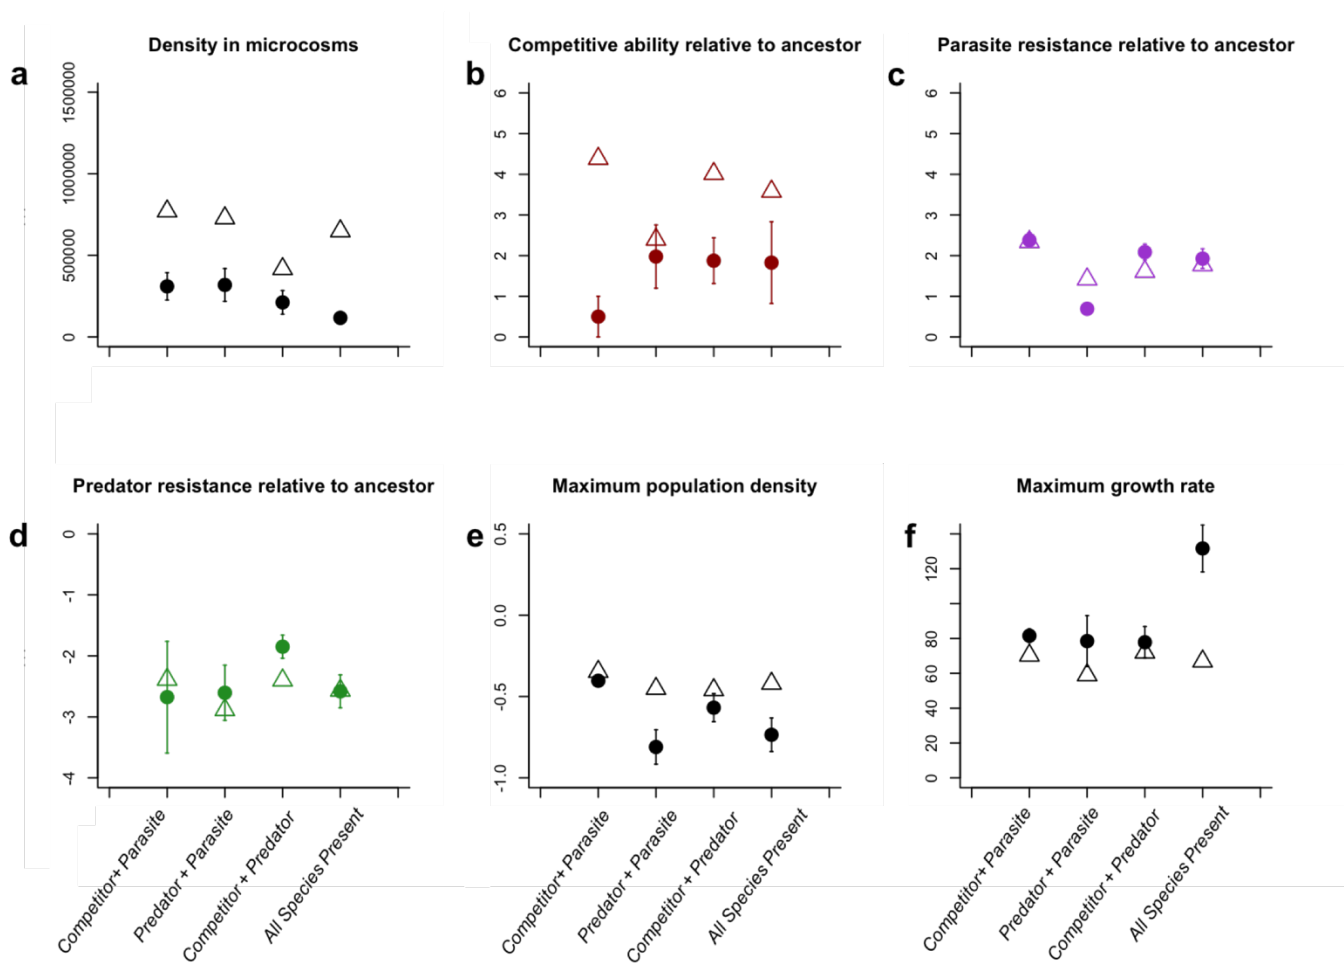

842

843 **Figure 3.** Predicted (open triangles) and observed (closed circles) measurements of

844 *B. subtilis* in multispecies communities. **a.** Density of *B. subtilis* per 1 ml microcosm

845 medium. **b.** Maximum population density. **c.** Maximum growth rate of evolved

846 isolates **d.** Competitive ability of *B. subtilis* isolates, measured as the ratio of *B.*

847 *subtilis* to *S. marcescens*. **e.** Relative resistance to parasites of *B. subtilis* across  
848 treatment groups. **f.** Growth of *B. subtilis* isolates in the presence of the predator *P.*  
849 *caudatum*. Predicted values were calculated as the mean ( $\pm$  s.e.) across antagonist  
850 monoculture treatments; For example, the predicted value for the competitor +  
851 parasite treatment was estimated by merging the competitor alone and parasite  
852 alone treatments and calculating their combined mean.
